# Supplementary material
Source: PubMed Central journal article supplement (PMC4068566)
Supplement: AAC.02738-13_zac007143020so1.pdf [file AAC.02738-13_zac007143020so1.pdf]

Supplementary Table S1

| Virulence determinant                | No. of isolates with virulence determinant |        |               |        |                           |        |                               |        |                 |        |                     |        | P value       |        |                   |        |               |                                               |                           |                       |
|--------------------------------------|--------------------------------------------|--------|---------------|--------|---------------------------|--------|-------------------------------|--------|-----------------|--------|---------------------|--------|---------------|--------|-------------------|--------|---------------|-----------------------------------------------|---------------------------|-----------------------|
|                                      | B2 (n=86)                                  |        | non-B2 (n=82) |        | B2-AMC-susceptible (n=39) |        | non-B2-AMC-susceptible (n=17) |        | B2-OXA-1 (n=23) |        | non-B2-OXA-1 (n=44) |        | B2-IRT (n=24) |        | non-B2-IRT (n=21) |        | B2 vs. non-B2 | B2-AMC-susceptible vs. non-B2-AMC-susceptible | B2-OXA-1 vs. non-B2-OXA-1 | B2-IRT vs. non-B2-IRT |
|                                      | n                                          | %      | n             | %      | n                         | %      | n                             | %      | n               | %      | n                   | %      | n             | %      | n                 | %      |               |                                               |                           |                       |
| <b>Adhesins</b>                      |                                            |        |               |        |                           |        |                               |        |                 |        |                     |        |               |        |                   |        |               |                                               |                           |                       |
| <i>pap A</i>                         | 28                                         | 32,6   | 19            | 23,2   | 16                        | 41,0   | 4                             | 23,5   | 5               | 21,7   | 10                  | 22,7   | 7             | 29,2   | 5                 | 23,8   |               |                                               |                           |                       |
| <i>pap C</i>                         | 32                                         | 37,2   | 37            | 45,1   | 15                        | 38,5   | 7                             | 41,2   | 8               | 34,8   | 23                  | 52,3   | 9             | 37,5   | 7                 | 33,3   |               |                                               |                           |                       |
| <i>pap EF</i>                        | 25                                         | 29,1   | 6             | 7,3    | 16                        | 41,0   | 3                             | 17,6   | 4               | 17,4   | 1                   | 2,3    | 5             | 20,8   | 2                 | 9,5    | <0,001        |                                               |                           |                       |
| <i>pap G</i>                         | 28                                         | 32,6   | 14            | 17,1   | 13                        | 33,3   | 7                             | 41,2   | 7               | 30,4   | 4                   | 9,1    | 8             | 33,3   | 3                 | 14,3   | 0,022         |                                               | 0,038                     |                       |
| <i>pap GI</i>                        | 0                                          | 0,0    | 0             | 0,0    | 0                         | 0,0    | 0                             | 0,0    | 0               | 0,0    | 0                   | 0,0    | 0             | 0,0    | 0                 | 0,0    |               |                                               |                           |                       |
| <i>pap GI'</i>                       | 1                                          | 1,2    | 0             | 0,0    | 1                         | 2,6    | 0                             | 0,0    | 0               | 0,0    | 0                   | 0,0    | 0             | 0,0    | 0                 | 0,0    |               |                                               |                           |                       |
| <i>pap GII</i>                       | 17                                         | 19,8   | 4             | 4,9    | 4                         | 10,3   | 1                             | 5,9    | 5               | 21,7   | 1                   | 2,3    | 8             | 33,3   | 2                 | 9,5    | 0,004         |                                               | 0,016                     |                       |
| <i>pap GIII</i>                      | 10                                         | 11,6   | 11            | 13,4   | 8                         | 20,5   | 6                             | 35,3   | 2               | 8,7    | 4                   | 9,1    | 0             | 0,0    | 1                 | 4,8    |               |                                               |                           |                       |
| <i>fim H</i>                         | 86                                         | 100,0  | 75            | 91,5   | 39                        | 100,0  | 15                            | 88,2   | 23              | 100,0  | 40                  | 90,9   | 24            | 100,0  | 20                | 95,2   |               |                                               |                           |                       |
| <i>afa</i>                           | 9                                          | 10,5   | 4             | 4,9    | 0                         | 0,0    | 0                             | 0,0    | 9               | 39,1   | 2                   | 4,5    | 0             | 0,0    | 2                 | 9,5    |               |                                               | <0,001                    |                       |
| <i>afa E8</i>                        | 2                                          | 2,3    | 21            | 25,6   | 0                         | 0,0    | 0                             | 0,0    | 2               | 8,7    | 20                  | 45,5   | 0             | 0,0    | 1                 | 4,8    | <0,001        |                                               | 0,002                     |                       |
| <i>sfa</i>                           | 20                                         | 23,3   | 12            | 14,6   | 17                        | 43,6   | 10                            | 58,8   | 1               | 4,3    | 0                   | 0,0    | 2             | 8,3    | 2                 | 9,5    |               |                                               |                           |                       |
| <i>foc G</i>                         | 21                                         | 24,4   | 17            | 20,7   | 9                         | 23,1   | 1                             | 5,9    | 5               | 21,7   | 10                  | 22,7   | 7             | 29,2   | 6                 | 28,6   |               |                                               |                           |                       |
| <i>clp G</i>                         | 4                                          | 4,7    | 1             | 1,2    | 4                         | 10,3   | 1                             | 5,9    | 0               | 0,0    | 0                   | 0,0    | 0             | 0,0    | 0                 | 0,0    |               |                                               |                           |                       |
| <i>iba</i>                           | 26                                         | 30,2   | 6             | 7,3    | 4                         | 10,3   | 1                             | 5,9    | 12              | 52,2   | 4                   | 9,1    | 10            | 41,7   | 1                 | 4,8    | <0,001        |                                               | <0,001                    | 0,005                 |
| <i>hra</i>                           | 23                                         | 26,7   | 40            | 48,8   | 15                        | 38,5   | 12                            | 70,6   | 5               | 21,7   | 21                  | 47,7   | 3             | 12,5   | 7                 | 33,3   | 0,004         |                                               |                           |                       |
| <i>bma E</i>                         | 19                                         | 22,1   | 25            | 30,5   | 17                        | 43,6   | 8                             | 47,1   | 1               | 4,3    | 15                  | 34,1   | 1             | 4,2    | 2                 | 9,5    |               |                                               | 0,007                     |                       |
| <i>gaf D</i>                         | 1                                          | 1,2    | 3             | 3,7    | 0                         | 0,0    | 0                             | 0,0    | 0               | 0,0    | 2                   | 4,5    | 1             | 4,2    | 1                 | 4,8    |               |                                               |                           |                       |
| <b>Siderophores</b>                  |                                            |        |               |        |                           |        |                               |        |                 |        |                     |        |               |        |                   |        |               |                                               |                           |                       |
| <i>fyu A</i>                         | 38                                         | 44,2   | 28            | 34,1   | 18                        | 46,2   | 9                             | 52,9   | 13              | 56,5   | 14                  | 31,8   | 7             | 29,2   | 5                 | 23,8   |               |                                               |                           |                       |
| <i>iro N</i>                         | 29                                         | 33,7   | 30            | 36,6   | 20                        | 51,3   | 8                             | 47,1   | 4               | 17,4   | 17                  | 38,6   | 5             | 20,8   | 5                 | 23,8   |               |                                               |                           |                       |
| <i>ire A</i>                         | 11                                         | 12,8   | 2             | 2,4    | 8                         | 20,5   | 1                             | 5,9    | 1               | 4,3    | 0                   | 0,0    | 2             | 8,3    | 1                 | 4,8    | 0,018         |                                               |                           |                       |
| <i>iut A</i>                         | 35                                         | 40,7   | 47            | 57,3   | 13                        | 33,3   | 6                             | 35,3   | 14              | 60,9   | 29                  | 65,9   | 8             | 33,3   | 12                | 57,1   | 0,044         |                                               |                           |                       |
| <b>Toxins</b>                        |                                            |        |               |        |                           |        |                               |        |                 |        |                     |        |               |        |                   |        |               |                                               |                           |                       |
| <i>hly D</i>                         | 26                                         | 30,2   | 7             | 8,5    | 13                        | 33,3   | 3                             | 17,6   | 5               | 21,7   | 1                   | 2,3    | 8             | 33,3   | 3                 | 14,3   | <0,001        |                                               | 0,016                     |                       |
| <i>hly F</i>                         | 12                                         | 14,0   | 29            | 35,4   | 2                         | 5,1    | 3                             | 17,6   | 4               | 17,4   | 18                  | 40,9   | 6             | 25,0   | 8                 | 38,1   | 0,002         |                                               |                           |                       |
| <i>cnf</i>                           | 7                                          | 8,1    | 5             | 6,1    | 2                         | 5,1    | 2                             | 11,8   | 1               | 4,3    | 2                   | 4,5    | 4             | 16,7   | 1                 | 4,8    |               |                                               |                           |                       |
| <i>cdts</i>                          | 8                                          | 9,3    | 0             | 0,0    | 4                         | 10,3   | 0                             | 0,0    | 2               | 8,7    | 0                   | 0,0    | 3             | 12,5   | 0                 | 0,0    | 0,007         |                                               |                           |                       |
| <i>clb B</i>                         | 21                                         | 24,4   | 5             | 6,1    | 15                        | 38,5   | 2                             | 11,8   | 1               | 4,3    | 0                   | 0,0    | 5             | 20,8   | 3                 | 14,3   | 0,001         |                                               |                           |                       |
| <i>clb N</i>                         | 41                                         | 47,7   | 4             | 4,9    | 30                        | 76,9   | 1                             | 5,9    | 2               | 8,7    | 0                   | 0,0    | 9             | 37,5   | 3                 | 14,3   | <0,001        | <0,001                                        |                           | 0,003                 |
| <i>ast A</i>                         | 6                                          | 7,0    | 8             | 9,8    | 6                         | 15,4   | 0                             | 0,0    | 0               | 0,0    | 1                   | 2,3    | 0             | 0,0    | 7                 | 33,3   |               |                                               |                           |                       |
| <i>vat</i>                           | 23                                         | 26,7   | 10            | 12,2   | 10                        | 25,6   | 1                             | 5,9    | 6               | 26,1   | 5                   | 11,4   | 7             | 29,2   | 4                 | 19,0   | 0,020         |                                               |                           |                       |
| <i>tsh</i>                           | 3                                          | 3,5    | 4             | 4,9    | 3                         | 7,7    | 1                             | 5,9    | 0               | 0,0    | 0                   | 0,0    | 0             | 0,0    | 3                 | 14,3   |               |                                               |                           |                       |
| <i>sat</i>                           | 36                                         | 41,9   | 7             | 8,5    | 9                         | 23,1   | 1                             | 5,9    | 17              | 73,9   | 5                   | 11,4   | 10            | 41,7   | 1                 | 4,8    | <0,001        |                                               | <0,001                    | 0,005                 |
| <i>pic</i>                           | 10                                         | 11,6   | 4             | 4,9    | 10                        | 25,6   | 4                             | 23,5   | 0               | 0,0    | 0                   | 0,0    | 0             | 0,0    | 0                 | 0,0    |               |                                               |                           |                       |
| <b>Capsula</b>                       |                                            |        |               |        |                           |        |                               |        |                 |        |                     |        |               |        |                   |        |               |                                               |                           |                       |
| <i>kps MTH</i>                       | 49                                         | 57,0   | 15            | 18,3   | 30                        | 76,9   | 6                             | 35,3   | 10              | 43,5   | 6                   | 13,6   | 9             | 37,5   | 3                 | 14,3   | <0,001        | 0,005                                         | 0,014                     |                       |
| <i>kps MTH K1</i>                    | 14                                         | 16,3   | 7             | 8,5    | 9                         | 23,1   | 5                             | 29,4   | 0               | 0,0    | 1                   | 2,3    | 5             | 20,8   | 1                 | 4,8    |               |                                               |                           |                       |
| <i>kps MTH K2</i>                    | 18                                         | 20,9   | 7             | 8,5    | 7                         | 17,9   | 1                             | 5,9    | 9               | 39,1   | 5                   | 11,4   | 2             | 8,3    | 1                 | 4,8    | 0,030         |                                               | 0,012                     |                       |
| <i>kps MTH K5</i>                    | 4                                          | 4,7    | 3             | 3,7    | 2                         | 5,1    | 0                             | 0,0    | 0               | 0,0    | 1                   | 2,3    | 2             | 8,3    | 2                 | 9,5    |               |                                               |                           |                       |
| <i>kps MTH</i>                       | 2                                          | 2,3    | 1             | 1,2    | 1                         | 2,6    | 0                             | 0,0    | 1               | 4,3    | 0                   | 0,0    | 0             | 0,0    | 1                 | 4,8    |               |                                               |                           |                       |
| <i>kps K15</i>                       | 1                                          | 1,2    | 0             | 0,0    | 1                         | 2,6    | 0                             | 0,0    | 0               | 0,0    | 0                   | 0,0    | 0             | 0,0    | 0                 | 0,0    |               |                                               |                           |                       |
| <b>Miscellaneous</b>                 |                                            |        |               |        |                           |        |                               |        |                 |        |                     |        |               |        |                   |        |               |                                               |                           |                       |
| <i>iss</i>                           | 13                                         | 15,1   | 36            | 43,9   | 6                         | 15,4   | 2                             | 11,8   | 4               | 17,4   | 26                  | 59,1   | 3             | 12,5   | 8                 | 38,1   | <0,001        |                                               | 0,002                     |                       |
| <i>cva C</i>                         | 3                                          | 3,5    | 14            | 17,1   | 1                         | 2,6    | 0                             | 0,0    | 2               | 8,7    | 13                  | 29,5   | 0             | 0,0    | 1                 | 4,8    | 0,004         |                                               |                           |                       |
| <i>tra T</i>                         | 38                                         | 44,2   | 29            | 35,4   | 15                        | 38,5   | 2                             | 11,8   | 12              | 52,2   | 21                  | 47,7   | 11            | 45,8   | 7                 | 33,3   |               |                                               |                           |                       |
| <i>rfc</i>                           | 4                                          | 4,7    | 1             | 1,2    | 4                         | 10,3   | 0                             | 0,0    | 0               | 0,0    | 1                   | 2,3    | 0             | 0,0    | 0                 | 0,0    |               |                                               |                           |                       |
| <i>omp T</i>                         | 35                                         | 40,7   | 14            | 17,1   | 22                        | 56,4   | 9                             | 52,9   | 7               | 30,4   | 2                   | 4,5    | 6             | 25,0   | 3                 | 14,3   | <0,001        |                                               | 0,006                     |                       |
| <i>fliC<sub>H7</sub></i>             | 5                                          | 5,8    | 1             | 1,2    | 5                         | 12,8   | 1                             | 5,9    | 0               | 0,0    | 0                   | 0,0    | 0             | 0,0    | 0                 | 0,0    |               |                                               |                           |                       |
| <i>ibe A</i>                         | 36                                         | 41,9   | 16            | 19,5   | 31                        | 79,5   | 14                            | 82,4   | 1               | 4,3    | 1                   | 2,3    | 4             | 16,7   | 1                 | 4,8    | 0,003         |                                               |                           |                       |
| <i>PAI<sub>CF103</sub></i>           | 69                                         | 80,2   | 17            | 20,7   | 28                        | 71,8   | 2                             | 11,8   | 20              | 87,0   | 10                  | 22,7   | 21            | 87,5   | 5                 | 23,8   | <0,001        | <0,001                                        | <0,001                    | <0,001                |
| <i>usp</i>                           | 58                                         | 67,4   | 10            | 12,2   | 34                        | 87,2   | 4                             | 23,5   | 13              | 56,5   | 4                   | 9,1    | 11            | 45,8   | 2                 | 9,5    | <0,001        | <0,001                                        | <0,001                    | 0,009                 |
| <b>Virulence Score Mean (Range)*</b> | 11,2                                       | (4-19) | 8,1           | (1-18) | 13,5                      | (4-19) | 10,2                          | (1-18) | 9,5             | (5-13) | 7,7                 | (1-13) | 9,0           | (5-17) | 7,3               | (2-12) | <0,001        | 0,021                                         | 0,009                     |                       |

\*Virulence Score: Sum of *pap* (counted only once regardless of the number of *pap* elements identified), of *sfa/foc* (counted only once regardless of the number of *sfaS* or *focG* elements identified) *clbB/N* (counted only once, regardless subunit detected) and all other VFes detected. Virulence scores were compared with the Mann-Whitney U test.
